## Pursuing a career in home healthcare

### 22 **Abstract**

23 Background: While the number of patients requiring home healthcare in Saudi Arabia is increasing,  
24 there is insufficient data on what attracts nurses to work in this field.

25 Objective: This qualitative study investigates how nursing students practicing in home healthcare  
26 perceive it as a future career.

27 Methods: A purposive sample was used to recruit fourth-year nursing students enrolled in an older  
28 adult nursing care course and trained in home healthcare settings. Data were gathered using five focus  
29 groups of five students each (a total of 25 students) and analyzed using thematic analysis.

30 Results: It was found that the majority of students did not perceive home healthcare as a viable career  
31 option compared to working in a hospital. They vacillated due to the nature of the work, safety  
32 concerns, working demands, invariability of health cases, and lack of opportunities for professional  
33 development. Nevertheless, some nursing students were amenable to pursuing a career in home  
34 healthcare due to the less working hours, sense of autonomy, and the ability to provide holistic care  
35 and educate patients and their families.

36 Conclusion: Population awareness programs are needed to overcome cultural barriers, increase student  
37 motivation and ultimately bolster the number of certified nurses working in home healthcare.

38 **Keywords: home healthcare, nursing students, experience, older adults, career choice**

39

### 40 **1 Background**

41 Home healthcare refers to the process of caring for patients suffering from acute, terminal, and chronic  
42 health conditions at the patient's home or designated care facilities in the community (1). Home  
43 healthcare also provides various community services, including preventive, nursing, and psychological  
44 care and support (6). This practice is unlike hospital-based services with advanced facilities that  
45 provide specific care for acute and chronic conditions; home healthcare primarily involves families,  
46 caregivers, and patients (2). In Saudi Arabia, home healthcare programs were started at the Green  
47 Crescent Hospital in 1980, followed by King Faisal Specialist Hospital and Research Centre in 1991,  
48 and King Fahad National Guard Hospital (KFNGH) in 1995 (3). Since then, many governmental and  
49 private healthcare organizations have implemented similar programs and offered similar services  
50 across the country (5).

## Pursuing a career in home healthcare

51 Home healthcare nursing has seen enhancements and growth as a result of demographic changes such  
52 as patient age, chronic diseases, and healthcare access. For example, in the US, 70.5% of home  
53 healthcare users are older adults with multiple chronic health conditions who need continuous  
54 monitoring (4), similar to the situation in Saudi Arabia (5,6). In addition, the rapid adoption of new  
55 technologies, such as telemedicine (7) and telephonic nursing follow-ups (8), has enhanced access to  
56 home healthcare, minimized hospital stay length, and improved quality of life (9).

57 Despite global developments in home healthcare, this specialized field still faces major nursing  
58 shortages (7). One of the considerable challenges in Saudi Arabia is a shortage of nurses in this field  
59 due to poor management, lack of suitable infrastructure, cultural barriers, low salary, inter-professional  
60 coordination and cooperation, and job dissatisfaction (10,11). Other contributing factors include a lack  
61 of home healthcare equipment, insufficient security measures, and quality indicators (12). These issues  
62 contribute to nurses' stress and burnout (10).

63 Several studies have focused on the challenges nurses face in home healthcare, while others have  
64 addressed factors that make the practice desirable. A sense of autonomy contributes to work  
65 satisfaction and nurses' desire to pursue home healthcare as a career (13). The sense of autonomy refers  
66 to individual freedom and the ability to make independent choices (14,15). Other factors include  
67 favourable employment conditions, having the space and time to offer quality care, work flexibility,  
68 and support from supervisors (16,17)

69 Although the literature has provided valuable information on the challenges and benefits of home care  
70 nursing work, it has only focused on the working nurse's perspective. No research has been conducted  
71 on prospective nursing students in the home healthcare profession. There is a need for qualitative  
72 studies which provide an in-depth analysis of all these factors to encourage the recruitment and  
73 retention of homecare nurses.

## Pursuing a career in home healthcare

74 Saudi nursing students especially lack home healthcare skills and knowledge. More detrimental is that  
75 this specialization is not often incorporated into the nursing curriculum of most nursing colleges (18).  
76 Most nursing students' clinical training generally focuses on hospital-based practice for all nursing  
77 competencies. Both governmental and private nursing schools fail to include home healthcare nursing  
78 in their list of mandatory clinical practices (19). Consequently, nursing students have limited  
79 knowledge of home healthcare and nursing duties compared to the key focus on the hospital-based  
80 learning experience. Moreover, the Saudi healthcare system is highly reliant on nurses (8). In addition,  
81 home healthcare is primarily run by nurses with fewer direct interventions from physicians. Further  
82 exacerbating these challenges are the nursing shortage, a lack of nursing student interest in community  
83 work, and a growing number of older adults needing home healthcare. The present study addresses  
84 some of these challenges by describing how nursing students in home healthcare perceive the  
85 specialization as a potential future career.

86 Research questions:

87 1) What are nursing students' perceptions toward working in home healthcare?

88 2) What factors motivate nursing students to work in home-based healthcare settings?

## 89 2 Methods

### 90 2.1 Research design

91 A qualitative descriptive phenomenological study approach (20) was used to describe nursing students'  
92 different experiences and perceptions toward home healthcare as a future career. An in-depth  
93 investigation was also conducted into the factors that motivate nursing students to work in home-based  
94 healthcare settings. The Consolidated Criteria for Reporting Qualitative Research (COREQ) (21) was  
95 used to ensure the study was satisfactorily reported.

### 96 2.2 Research setting and sample

## Pursuing a career in home healthcare

97 The study was implemented at a Saudi government university for females in the College of Nursing,  
98 Riyadh, Saudi Arabia. A purposive sample of undergraduate female nursing students was selected  
99 according to the following inclusion criteria. They were (a) female nursing students enrolled in a  
100 baccalaureate nursing program. The nursing students must be (b) in their fourth year of study, enrolled  
101 in a course on nursing care for older adults, and trained in older adult home healthcare as part of the  
102 course curriculum. The selected college was incorporating home healthcare training into its curriculum  
103 for the first time. The total number of eligible participants was  $N = 144$ ; the collected sample size was  
104  $n = 25$ . This was based on the “code saturation” as no more new frequent codes were noticed. Also,  
105 “information power” was used for better understanding of the discussed issues which focused on the  
106 rich information retrieved from the participants regardless their small number.

### 107 **2.3 Data collection process**

108 All students who met the inclusion criteria were invited to participate in a focus group interview by the  
109 academic student affairs unit. The research team developed a topic guide based on existing literature  
110 to investigate the nursing students' overall experience in nursing home healthcare. This guide focused  
111 on students' feelings and opinions of home healthcare nursing and the benefits, challenges, and  
112 receptiveness to working in the specialization. Props were used to encourage student participation and  
113 provide clearer explanations and examples. Experts on the home healthcare topic guide were consulted  
114 to ensure the validity of the questions.

115 Ultimately, 25 students participated in five focus groups of five students each. The focus groups  
116 emphasized interaction and discussion among the participants and described the different views in a  
117 safe, respectful environment. The groups were facilitated by the first author, conducted in Arabic, and  
118 lasted for approximately one hour. As the first author was a faculty member, many precautions were  
119 taken to minimize coercion problems. Firstly, the selected participants were not taught by the first

## Pursuing a career in home healthcare

120 author. Secondly, participants were informed that participation was voluntary and that their grades  
121 would not be affected. All focus groups were conducted in one of the College of Nursing meeting  
122 rooms.

123 Audio of all five focus groups was recorded and password protected to safeguard participant  
124 confidentiality. Only research investigators had access to this information. The interviews were  
125 transcribed verbatim into English, verified using the audio recordings, and reviewed for accuracy after  
126 the first and third authors assessed them. Since, the first and third authors were bilingual, they checked  
127 the accuracy of the verbatim translation to ensure the credibility and validity of the results after  
128 translation.

### 129 **2.4 Ethical consideration**

130 Ethical approval for the study was obtained from the selected university (ref no:19-0199). Informed  
131 consent was obtained from all participants by the research team, who explained that they could  
132 withdraw from the study at any time. All study-related information was explained to the participants  
133 by the research team, who had no direct relationship with them to avoid any incidence of coercion.  
134 Students were also reassured that their marks would not be affected. Selected identification letters and  
135 numbers were assigned to each student to promote the confidentiality and anonymity of the  
136 participants.

137

### 138 **2.5 Data analysis**

139 Inductive thematic analysis was used to analyse the data (22). First, the researchers read the transcripts  
140 several times to familiarize themselves with the data and ensure its accuracy. Second, initial notes and  
141 codes were generated. Third, patterns and similarities across the data were identified, and themes were

## Pursuing a career in home healthcare

142 developed. Fourth, the main themes and subthemes were formulated. Finally, themes and supporting  
143 data from transcript extracts or quotes were outlined.

### 144 **3 Results**

145 Three central themes emerged. These themes focused on the benefits of working in home healthcare  
146 nursing, the challenges of working in home healthcare nursing, and working in home healthcare vs.  
147 hospital. Respondents also noted that the nature of home healthcare nursing work differs from work in  
148 hospital settings. Furthermore, students discussed their opinions on working as nurses in home  
149 healthcare and whether they would choose home healthcare as a future career path.

#### 150 **3.1 Benefits of working in home healthcare nursing**

151 The students mentioned several benefits related to working in home healthcare nursing during the focus  
152 groups, including independence, and closeness and trust.

##### 153 ***3.1.1 Independence at work***

154 Independence at work identified as main them emerge from students focus group interviews. As from  
155 frequent students' answers home healthcare nurses are independent in their decision-making, with a  
156 high feeling of autonomy and self-efficacy in delivering complete care to older adults in their homes,  
157 which includes evaluation, intervention, and education. Several responses from the student to describe  
158 dependency at work the following student describe sense of autonomy by decision making:

159 *“The good side of home healthcare nursing is that a nurse is able to make decisions and focus on one*  
160 *patient.” (C2)*

161 The other students achieve independence by dealing with the patient and their family one-to-one:

162

## Pursuing a career in home healthcare

163 *“I only have a patient and caregivers, which increases my independence. I give medicine and act on*  
164 *the treatment plan for the patient.” (A4)*

165 *“I am alone with the patient, not with too much advanced medical equipment, and that makes me feel*  
166 *more independent.” (C1)*

167 Also, some students commented in their abilities to do an environmental assessment along with  
168 educating the patients and his or her household members:

169 *“For the first time, I was able to do an environmental assessment.” (E3)*

170 *“I got the chance to educate the patient as well as the caregivers.” (A4)*

### 171 **3.1.2 Closeness and trust**

172 The students understood the importance of the homecare nurses’ ability to establish trust with their  
173 patients and families. Students discussed the great esteem in which patients and their families hold  
174 home healthcare nurses. Furthermore, being an Arabic-proficient Saudi student also helped foster trust  
175 and strengthened the relationships with patients and their families:

176 *“The trust between the patient and the nurse in home healthcare nursing is higher than in the hospital.”*  
177 *(B3)*

178 Further students describe presence of an Arabic-proficient Saudi student on fostering trust and  
179 strengthening relationships:

180 *“Some patients were very glad that I’m Saudi and I took care of them. Their words were encouraging*  
181 *[...]. I mean yes, they (patients) need Saudi nurses because we can understand them.” (D4)*

182 *“I remember when I first entered the patient’s house, they [patient’s family] thought that I’m a*  
183 *foreigner, but when I spoke in Arabic, they were shocked that I’m Saudi.” (C4)*



184 The nurses also bonded with their patients because of frequent and long-term visits. One of the nurses  
185 said that *“if the patient’s case resulted in deterioration or death, [she] would be very sad as the patient*  
186 *was viewed as part of [her] family.”* (A2)

187 Many students felt confident performing basic nursing skills and assessments, as the environment was  
188 conducive to learning. This was often contrary to their experience in the hospitals, where some patients  
189 underestimated the knowledge and skills of the nursing students:

190 *“In home healthcare, I feel that I’m closer to my patients, I can do patients’ assessment from different*  
191 *angles like social, psychological, environmental, and physical.”* (B4)

### 192 **3.2 Challenges working in home healthcare nursing**

193 The students indicated several difficulties with training in home healthcare. Most importantly was a  
194 lack of preparation, a difficult and demanding setting, and an uncomfortable atmosphere.

#### 195 **3.2.1 Unanticipated situations**

196 Students frequently expressed concerns about facing unanticipated issues in home healthcare and lack  
197 of training in how to deal with aggressive and violent patients and family caregiver neglect while  
198 the incident occurs in their homes:

199 *“We were supposed to have an introductory course on home care nursing and about the student’s*  
200 *challenges.”* (A3)

201 Some students have questioned the skills they learned during the course and felt that they were not  
202 sufficiently prepared to deal with older adults and violent cases:

203 *“One day the patient was yelling at me and screaming. I got scared. The college didn’t prepare us*  
204 *how to deal with such cases like violence or harassment or how to comfort patient.”* (E4)

### 205 **3.2.2 Complex and demanding setting**

206 Students reported that working in home healthcare requires a particular personality type and an affinity  
207 for managing and communicating with older adult patients.

208 *“Home healthcare nurses mostly deal with elderly patients and honestly, I don’t know really how to*  
209 *deal with them.” (C3)*

210 *“I was excited to teach the patients, but at the same time, I was anxious because of responsibility on*  
211 *my shoulders as I’m the only Saudi female who’s giving them the information.” (B4)*

212 *“The nurse acting as a social worker, psychologist. She was doing multiple roles at once” (E5).*

213 In addition, some students felt that while the sense of autonomy in home healthcare is high, this puts  
214 more pressure on them to do all the care work independently, with minimal help from others.

215 *“The nurse there [...] is overwhelmed with the working load because she was taking over all the health*  
216 *healthcare team roles like being the doctor, educator, phlebotomist, and the physiotherapist.” (C2)*

217 *“Tele-nurse should be implemented at the home healthcare so the patients can ask or receive any*  
218 *information. In terms of the nursing training, I would recommend less paperwork and more hands-*  
219 *on.” (C4)*

### 220 **3.3 Home healthcare vs. hospital**

221 The primary student perception was that they would prefer to work in a hospital rather than a home  
222 healthcare setting. Furthermore, they indicated how different the nursing jobs performed in the two  
223 environments were.

#### 224 **3.3.1 Working nature**

## Pursuing a career in home healthcare

225 Students highlighted the lower workload in home healthcare, which consists primarily of basic tasks,  
226 when compared to hospital tasks. One commentator, for example, said the following to describe  
227 nursing work as routine work and not requiring specialized care:

228 *“Most of the cases were stable and didn’t require a complex care, [...] it was a routine work.”* (E2)

229 Furthermore, some students felt that the workload in home healthcare is low compared to hospitals, as  
230 there are fewer complications during a home healthcare visit and no need for further care interventions  
231 over and above what is expected:

232 *“I might consider working in home healthcare in the future because the workload is light and most of  
233 the cases are stable.”* (C3)

234 *“At home healthcare, the working load is 8 hours compared to 12 hours at the hospital.”* (E1)

235 Students also felt that the home healthcare nursing tasks were too routine and limited to patient vital  
236 sign assessments, which are not as beneficial as hospital training.

237 *“The home healthcare will not add that much to my professional development. There I’ll spend the  
238 whole day checking the vital signs, and this is very routine.”* (D3)

239 Safety concerns were a key reason for some students opting for a career in hospitals. They felt that  
240 there are safety measures in place at hospitals, while home healthcare teams are put at risk when they  
241 travel to unsafe locations to visit their patients:

242 *“The hospital is more secure and safer than home healthcare. Here you are responsible for your own  
243 safety.”* (A1)

244 *“I went to remote areas. The houses were in poor conditions and located in unsafe neighbourhoods.”  
245 (A1)*

### 246 3.3.2 Professional growth

247 Most interviewed students disregarded home healthcare nursing as a career option and preferred  
248 hospitals for various reasons. First, the students focused on a stimulating specialization where they  
249 could develop their clinical skills and have more opportunities for professional advancements, such as  
250 in the emergency department or intensive care unit.

251 Some students stated hospital nurses are skilful and describe home care nurses because as limited to  
252 communication skills with older people:

253 *“I think hospital nurses are skilful as they practice on a daily basis. But in-home nursing, nurses’ skills*  
254 *are limited as they can only follow one patient’s condition.”* (B2)

255 Students perceived hospital nurses’ work descriptions as more structured than those of home healthcare  
256 nurses, where patient-cantered care is the primary focus:

257 *“At the hospital, everyone knows his/her responsibilities.”* (B4)

## 258 4 Discussion

259 This qualitative study provided valuable insights into the perceived benefits and challenges of home  
260 healthcare from the nursing students’ perspective. Some students found home healthcare appealing  
261 because of patients’ hospitality and gratitude, as a sense of belonging is important for nurses’ work  
262 motivation (23).

263 Furthermore, many participants reported positive experiences as they learned to overcome their fears,  
264 be more independent, and become more patient-cantered. This personal development is facilitated by  
265 the nature of home healthcare, which has a one-to-one nurse-patient ratio. These circumstances nurture  
266 closer practitioner-patient relationships and enable strong interpersonal bonds to form. A study in  
267 Canada showed that nursing students gained valuable insights into their patients but also developed

## Pursuing a career in home healthcare

268 confidence in their abilities and took more initiative with their self-directed learning. Consequently,  
269 they experienced greater autonomy and independence over time (24). Calma et al. (2019) demonstrated  
270 the importance of characteristics particular to home healthcare nurses, such as personality, capability,  
271 self-confidence, sociability, communication skills, and autonomy (25). Some of these factors were  
272 common to the present study, especially autonomy.

273 Participants indicated feelings of independence in home healthcare. They could communicate with  
274 patients in a common language, which helped them understand their patient's condition and provide  
275 better feedback and education. Anecdotal evidence shows that 70% of nurses in the Saudi healthcare  
276 system do not speak Arabic or come from different cultures (9,10). This may limit their ability to  
277 communicate efficiently with patients. Therefore, policymakers, healthcare organizations, educators,  
278 and healthcare professionals must adopt practices that help attract and retain Saudi nurses working in  
279 home healthcare (26).

280 Some students have experienced difficulties handling the holistic approach required in home healthcare  
281 nursing. According to Nabolsi et al. (2012), nurses' responsibilities and roles, such as records  
282 maintenance and patient treatment, can vary substantially (27). Some discussions with the participants  
283 in the present study regarding their workload indicated that home nursing was a highly demanding job  
284 compared to other professions (28).

285 The current study demonstrated that some students felt uncomfortable or unsafe in the home nursing  
286 environment, negatively affecting their perspective on the specialization as a potential career. Research  
287 also shows that home healthcare clinics are considered an unsafe and sometimes violent work  
288 environment (29).

## Pursuing a career in home healthcare

289 Accessibility of the patient homes also appears to be a challenge globally (30). The present study found  
290 that some students could not travel to a dwelling for work or were uncomfortable with traveling long  
291 distances. While the participants were familiar with the hospital location and routes, home healthcare  
292 settings are often not easily accessible or safe to approach. Thus, it is essential to ensure the  
293 accessibility and safety of home healthcare nursing for students and healthcare professionals.

294 Many participants were uncertain about choosing home healthcare as a career because it was perceived  
295 as a complex and demanding setting. Most nursing students prefer to work in hospitals due to better  
296 opportunities to develop professionally and apply critical thinking skills. This finding is in line with  
297 existing research (27,31,32). In the Netherlands, Van Iersel et al. (2018) found that only 5.4% of first-  
298 year nursing students would consider working in home healthcare compared to 72% who would rather  
299 work in a general hospital (33).

300 Research also finds that nursing students perceived home healthcare as physically demanding,  
301 unappealing, unchallenging (34), undistinguished, and insufficiently equipped to handle the needs of  
302 the patients (35). However, there were nursing students who felt fulfilled by the experience and  
303 expressed a desire to pursue a career in home healthcare. Other students were uncertain of what career  
304 specialization to pursue. This can be attributed to a lack of experience or knowledge of the potential  
305 nursing career paths (27). The nursing curriculum and clinical practices design substantially impact  
306 students' preferences and career choices (36). Similarly, students' career preferences are influenced by  
307 the programs and modules they undertake at the university level (37). Universities and educators should  
308 consider this when designing university curricula to support nursing students in career planning.

309 The students sampled in the present study wanted a better-structured training program. Some were  
310 shocked by the lack of preparation or introductory lectures. Some key areas for improvement in nursing  
311 education include high-quality clinical placements for exposure and skill practice. In addition, targeted

## Pursuing a career in home healthcare

312 educational interventions should be included in the curriculum (38). A well-designed curriculum that  
313 includes a preparatory introductory course can help ensure professional competence and quality of  
314 home healthcare. It is important to note that clinical practice can shape student perceptions (39).  
315 Clinical placements in community care should offer students the opportunity for inter-professional  
316 collaboration, a chance to deal with the complexities of home-based patients, and engagement in an  
317 advanced care role (28). Moreover, students should be supported by specialized staff who can work  
318 across universities and placement settings (40).

319 A well-designed preparatory course must be included in the curriculum. Continuous medical education,  
320 including academic activities to increase home healthcare knowledge, is paramount. These student  
321 development aspects can be complemented by participation in conferences and research. Furthermore,  
322 media, workshops, seminars, and symposia can promote home healthcare knowledge and awareness.  
323 The need for extracurricular activities is apparent in a study from the Eastern Province of Saudi Arabia,  
324 which found that hospital-based experience was the primary source of information for health  
325 professionals (11).

326 Many studies have highlighted mentors' contributions to healthcare education (37). Bjork et al. (2014)  
327 highlighted that the preceptor and clinical instructor play crucial roles in assessing training progress  
328 (41). Similarly, Bisholt et al. (2014) revealed that home healthcare behaviors are substantially  
329 influenced by clinical instructor's attitudes, indicating that her presence plays a role in building  
330 student's confidence (36). Research has found that the pedagogical atmosphere fostered by the  
331 relationship with supervisors was a factor in shaping first-year nursing students' perceptions of older  
332 adult care (39).

### 333 4.1 Strengths and limitations

## Pursuing a career in home healthcare

334 This study makes a valuable contribution to the existing literature as no qualitative studies have been  
335 conducted on home healthcare nursing in the Middle East and Saudi Arabia. This study provides a  
336 novel perspective on how student nurses perceive careers in home nursing. Furthermore, this study  
337 outlines the benefits and challenges of working in homecare nursing. A crucial aspect of home  
338 healthcare was identified in the interviews: the patient experience. When a nurse from the same  
339 background, speaking the same language, was treating them, patients and their families felt more  
340 comfortable—patient comfort is vital to patient care.

341 This study has some limitations. First, only a small sample from a single government institution was  
342 used, which may not be representative of all nursing students in Saudi Arabia. Consequently, the results  
343 may have limited generalizability. Second, only interviews were used for data collection. As such,  
344 mixed methods studies may be beneficial in future research. Future studies should engage in multi-  
345 methods research. Broader focus elements should be included, such as the experience of nurses of both  
346 genders, all grades, and from variable institutions (public and governmental). Further insights might  
347 be gained by comparing the findings of these studies with similar healthcare studies from other regions  
348 and settings.

### 349 **4.2 Implications**

350 Implementing population awareness programs on the role of home healthcare is needed. This will help  
351 set realistic expectations and overcome cultural barriers and prejudices in patients and their families.  
352 Better-equipped home healthcare, clear practitioner responsibilities, and continuous onsite personnel  
353 and educational support can improve nursing students' career satisfaction and nurture a sense of  
354 professional development. Furthermore, early progressive involvement of nursing students in home  
355 healthcare during their academic curriculum—starting from the first year—will familiarize them with  
356 the benefits of working in home healthcare. Clinical placement environments should be educationally  
357 enriched with equipment and support from multidisciplinary teams and practitioners. This will provide



## Pursuing a career in home healthcare

358 more opportunities for professional development. Lastly, educators should provide individualized  
359 student mentorship via interviews or group meetings. This can aid in understanding their motivation,  
360 educational needs, and other concerns. Educators must realize their role in influencing student career  
361 choices.

### 362 **5 Conclusion**

363 This study provides valuable insights into Saudi nursing students' current attitudes and perceptions  
364 toward home healthcare as a career option. Notably, the majority of students did not perceive home  
365 healthcare as a viable career option compared to working in hospitals. Their hesitation was largely due  
366 to the nature of the work, safety issues, lack of experiential diversity, and lack of opportunities for  
367 professional development. Regardless, some nursing students expressed an interest in home healthcare  
368 due to variable factors. These included limited working hours, a sense of autonomy, less demanding  
369 care, and the ability to educate patients and their families.

### 370 **6 Acknowledgements**

371 The authors express their gratitude to Princess Nourah bint Abdulrahman University Researchers  
372 Supporting Project number (PNURSP2023R312), Princess Nourah bint Abdulrahman University,  
373 Riyadh, Saudi Arabia.

### 374 **7 Author contributions**

375 Conceptualization, W.A and T.A; methodology, W.A, T.A and S.K; formal analysis, W.A AND T.A;  
376 review and editing, W.A, T.A and S.K.

### 377 **8 Conflict of Interest**

378 The authors declare that the research was conducted in the absence of any commercial or financial  
379 relationships that could be construed as potential conflicts of interest.

### 380 **9 Funding statement**

381 This work is supported by Princess Nourah bint Abdulrahman University Researchers Supporting  
382 Project number (PNURSP2023R312), Princess Nourah bint Abdulrahman University, Riyadh, Saudi  
383 Arabia.

### 384 **References**

- 385 1. Aceto G, Persico V, Pescapé A. The role of Information and Communication Technologies in  
386 Healthcare: taxonomies, perspectives, and challenges. Vol. 107, Journal of Network and  
387 Computer Applications. 2018.
- 388 2. Lafortune C, Huson K, Santi S, Stolee P. Community-based primary health care for older  
389 adults: A qualitative study of the perceptions of clients, caregivers and health care providers.  
390 BMC Geriatrics. 2015;15(1).
- 391 3. Walston SL, Al-Harbi Y, Al-Omar B. The changing face of healthcare in Saudi Arabia. *Annals*  
392 *of Saudi Medicine*. 2008;28(4).
- 393 4. Han SJ, Kim HK, Storfjell J, Kim MJ. Clinical outcomes and quality of life of home health  
394 care patients. *Asian Nursing Research*. 2013;7(2).
- 395 5. Al-Surimi K, Al-Harbi I, El-Metwally A, Badri M. Quality of life among home healthcare  
396 patients in Saudi Arabia: Household-based survey. *Health and Quality of Life Outcomes*.  
397 2019;17(1).
- 398 6. Alabbasi KH, Kruger E, Tennant M. Long term implications of home healthcare management  
399 on mortality in older adults with functional difficulties in the Saudi community. *Geriatrics*  
400 (Switzerland). 2021;6(4).
- 401 7. Ohta R, Ryu Y, Katsube T. Challenges for Japanese rural home care workers in  
402 interprofessional collaboration: a qualitative study. *Home Health Care Services Quarterly*.  
403 2018;37(4).
- 404 8. Valdivieso B, García-Sempere A, Sanfélix-Gimeno G, Faubel R, Librero J, Soriano E, et al.  
405 The effect of telehealth, telephone support or usual care on quality of life, mortality and  
406 healthcare utilization in elderly high-risk patients with multiple chronic conditions. A  
407 prospective study. *Medicina Clinica*. 2018;151(8).
- 408 9. Al Anazi M, Al-Surimi K, Abu-Shaheen A. Quality of home healthcare among Arab countries.  
409 Vol. 41, *Saudi Medical Journal*. 2020.
- 410 10. Alodhayani AA, Hassounah MM, Qadri FR, Abouammoh NA, Ahmed Z, Aldahmash AM.  
411 Culture-Specific Observations in a Saudi Arabian Digital Home Health Care Program: Focus  
412 Group Discussions with Patients and Their Caregivers. *Journal of Medical Internet Research*.  
413 2021;23(12).

## Pursuing a career in home healthcare

- 414 11. ALhazmi AM & Al-Kurashi NY. Health care professionals' knowledge on home health care in  
415 Al-khobar and Al-dammam. *Journal of Family & Community Medicine*. 2005;12(3):115.
- 416 12. Dhahi SA. Prevalence of burnout among home health care staff members in Saudi Arabia,  
417 2010. *European Geriatric Medicine*. 2012;3.
- 418 13. Jacobs G. Patient autonomy in home care: Nurses' relational practices of responsibility.  
419 *Nursing Ethics*. 2019;26(6).
- 420 14. Maurits EEM, de Veer AJE, Groenewegen PP, Francke AL. Home-care nursing staff in self-  
421 directed teams are more satisfied with their job and feel they have more autonomy over patient  
422 care: a nationwide survey. *Journal of Advanced Nursing*. 2017;73(10).
- 423 15. Ellenbecker CH. A theoretical model of job retention for home health care nurses. *Journal of*  
424 *Advanced Nursing*. 2004;47(3).
- 425 16. Ruotsalainen S, Jantunen S, Sinervo T. Which factors are related to Finnish home care  
426 workers' job satisfaction, stress, psychological distress and perceived quality of care? - A  
427 mixed method study. *BMC Health Services Research*. 2020;20(1).
- 428 17. Stutte K, Hahn S, Fierz K, Zúñiga F. Factors associated with aggressive behavior between  
429 residents and staff in nursing homes. *Geriatric Nursing*. 2017;38(5).
- 430 18. Alshehry AS, Almazan JU, Alquwez N. Influence of Religiosity on the Saudi Nursing  
431 Students' Attitudes Toward Older People and Perceptions on Elderly Care. *Journal of Religion*  
432 *and Health*. 2020;59(6).
- 433 19. Mohammed RF, Abdel A, Omar A. Knowledge about Elderly Care and Its Relation to Ageism  
434 Attitude among Undergraduate Nursing Students. *American Journal of Nursing Research*.  
435 2019;7(1).
- 436 20. Holloway I, Galvin K. *Qualitative Research in Nursing and Healthcare*. Vol. 19, John Wiley &  
437 Sons, Incorporated. 2017.
- 438 21. Tong A, Sainsbury P, Craig J. Consolidated criteria for reporting qualitative research  
439 (COREQ): A 32-item checklist for interviews and focus groups. *International Journal for*  
440 *Quality in Health Care*. 2007;19(6).
- 441 22. Braun V, Clarke V. Using thematic analysis in psychology. *Qualitative Research in*  
442 *Psychology*. 2006;3(2).
- 443 23. Albloushi M, Ferguson L, Stamler L, Bassendowski S, Hellsten L, Kent-Wilkinson A. Saudi  
444 female nursing students experiences of sense of belonging in the clinical settings: A qualitative  
445 study. *Nurse Education in Practice*. 2019;35.
- 446 24. Moquin H, Seneviratne C, Venturato L. From apprehension to advocacy: A qualitative study  
447 of undergraduate nursing student experience in clinical placement in residential aged care.  
448 *BMC Nursing*. 2018;17(1).

## Pursuing a career in home healthcare

- 449 25. Calma KRB, Halcomb E, Stephens M. The impact of curriculum on nursing students'  
450 attitudes, perceptions and preparedness to work in primary health care: An integrative review.  
451 Vol. 39, Nurse Education in Practice. 2019.
- 452 26. Legg L, Gladman J, Drummond A, Davidson A. A systematic review of the evidence on home  
453 care reablement services. Vol. 30, Clinical Rehabilitation. 2016.
- 454 27. Nabolsi M, Zumot A, Wardam L, Abu-Moghli F. The Experience of Jordanian Nursing  
455 Students in their Clinical Practice. *Procedia - Social and Behavioral Sciences*. 2012;46.
- 456 28. Philibin CAN, Griffiths C, Byrne G, Horan P, Brady AM, Begley C. The role of the public  
457 health nurse in a changing society. *Journal of Advanced Nursing*. 2010;66(4).
- 458 29. Walivaara BM. Caring Relationships in Home-Based Nursing Care – Registered Nurses'  
459 Experiences. *The Open Nursing Journal*. 2013;7(1).
- 460 30. Craven C, Byrne K, Sims-Gould J, Martin-Matthews A. Types and patterns of safety concerns  
461 in home care: Staff perspectives. *International Journal for Quality in Health Care*. 2012;24(5).
- 462 31. Abbey J, Abbey B, Bridges P, Elder R, Lemcke P, Liddle J, et al. Clinical placements in  
463 residential aged care facilities: The impact on nursing students' perception of aged care and  
464 the effect on career plans. *Australian Journal of Advanced Nursing*. 2006;23(4).
- 465 32. Stevens JA. Student nurses' career preferences for working with older people: A replicated  
466 longitudinal survey. *International Journal of Nursing Studies*. 2011;48(8).
- 467 33. van Iersel M, Latour CHM, de Vos R, Kirschner PA, Scholte op Reimer WJM. Perceptions of  
468 community care and placement preferences in first-year nursing students: A multicentre, cross-  
469 sectional study. *Nurse Education Today*. 2018;60.
- 470 34. Haron Y, Levy S, Albagli M, Rotstein R, Riba S. Why do nursing students not want to work in  
471 geriatric care? A national questionnaire survey. *International Journal of Nursing Studies*.  
472 2013;50(11).
- 473 35. Hebditch M, Daley S, Wright J, Sherlock G, Scott J, Banerjee S. Preferences of nursing and  
474 medical students for working with older adults and people with dementia: A systematic  
475 review. *BMC Medical Education*. 2020;20(1).
- 476 36. Bisholt B, Ohlsson U, Engström AK, Johansson AS, Gustafsson M. Nursing students'  
477 assessment of the learning environment in different clinical settings. *Nurse Education in*  
478 *Practice*. 2014;14(3).
- 479 37. Carlson E, Idvall E. Who wants to work with older people? Swedish student nurses'  
480 willingness to work in elderly care-A questionnaire study. *Nurse Education Today*.  
481 2015;35(7).
- 482 38. Brown J, Nolan M, Davies S, Nolan J, Keady J. Transforming students' views of  
483 gerontological nursing: Realising the potential of "enriched" environments of learning and  
484 care: A multi-method longitudinal study. *International Journal of Nursing Studies*. 2008;45(8).

## Pursuing a career in home healthcare

- 485 39. Husebø AML, Storm M, Våga BB, Rosenberg A, Akerjordet K. Status of knowledge on  
486 student-learning environments in nursing homes: A mixed-method systematic review. Vol. 27,  
487 Journal of Clinical Nursing. 2018.
- 488 40. Betony K. Clinical practice placements in the community: A survey to determine if they  
489 reflect the shift in healthcare delivery from secondary to primary care settings. Nurse  
490 Education Today. 2012;32(1).
- 491 41. Björk LG, Browne-Ferrigno T, Kowalski TJ. The Superintendent and Educational Reform in  
492 the United States of America. Leadership and Policy in Schools. 2014;13(4).
